# Supplementary material
Source: HighWire-hosted journal article supplement (https://jnm.snmjournals.org/highwire/filestream/94232/field_highwire_adjunct_files/0/jnm079137_Supplemental_Tables.pdf)
Supplement: jnm079137_Supplemental_Tables.pdf [file jnm079137_Supplemental_Tables.pdf]

**Supplemental Table 1. Absolute values for test and retest scans with regions of interest delineated on LD-CT**

| Patient no. | Lesion          | TEST                      |                                                        |                                          |                                                        |                                          | RETEST                    |                                                        |                                          |      |
|-------------|-----------------|---------------------------|--------------------------------------------------------|------------------------------------------|--------------------------------------------------------|------------------------------------------|---------------------------|--------------------------------------------------------|------------------------------------------|------|
|             |                 | VOI<br>(cm <sup>3</sup> ) | BSIF                                                   |                                          | IDIF                                                   |                                          | VOI<br>(cm <sup>3</sup> ) | IDIF                                                   |                                          |      |
|             |                 |                           | Perfusion<br>(ml•cm <sup>-3</sup> •min <sup>-1</sup> ) | V <sub>T</sub><br>(ml•cm <sup>-3</sup> ) | Perfusion<br>(ml•cm <sup>-3</sup> •min <sup>-1</sup> ) | V <sub>T</sub><br>(ml•cm <sup>-3</sup> ) |                           | Perfusion<br>(ml•cm <sup>-3</sup> •min <sup>-1</sup> ) | V <sub>T</sub><br>(ml•cm <sup>-3</sup> ) |      |
| 1           | Primary*        | n.a.                      | n.a.                                                   | n.a.                                     | n.a.                                                   | n.a.                                     | n.a.                      | n.a.                                                   | n.a.                                     | n.a. |
| 2           | Primary         | 15.4                      | 0.14                                                   | 0.38                                     | 0.10                                                   | 0.48                                     | 16.4                      | 0.11                                                   | 0.39                                     | 0.39 |
| 3           | Primary         | 378.9                     | 0.17                                                   | 0.38                                     | 0.18                                                   | 0.48                                     | 358.9                     | 0.19                                                   | 0.42                                     | 0.42 |
| 4           | Primary         | 11.1                      | 0.04                                                   | 0.21                                     | 0.05                                                   | 0.38                                     | 9.4                       | 0.05                                                   | 0.23                                     | 0.23 |
| 5           | Primary         | 19.0                      | 0.70                                                   | 0.71                                     | 0.72                                                   | 0.84                                     | 16.1                      | 0.72                                                   | 0.81                                     | 0.81 |
| 6           | Primary         | 43.4                      | 0.29                                                   | 0.70                                     | 0.28                                                   | 0.63                                     | 39.6                      | 0.28                                                   | 0.52                                     | 0.52 |
| 7           | Primary         | 210.9                     | 0.18                                                   | 0.55                                     | 0.25                                                   | 0.74                                     | 203.3                     | 0.28                                                   | 0.83                                     | 0.83 |
|             | Ln <sub>m</sub> | 4.5                       | 0.11                                                   | 0.38                                     | 0.16                                                   | 0.51                                     | 6.7                       | 0.22                                                   | 0.59                                     | 0.59 |
|             | Ln <sub>m</sub> | 2.2                       | 0.12                                                   | 0.36                                     | 0.18                                                   | 0.48                                     | 2.6                       | 0.18                                                   | 0.64                                     | 0.64 |
| 8           | Primary         | 2.4                       | 0.07                                                   | 0.35                                     | 0.14                                                   | 0.47                                     | 2.7                       | 0.17                                                   | 0.30                                     | 0.30 |
| 9           | Primary         | 10.9                      | 0.34                                                   | 0.85                                     | 0.27                                                   | 0.69                                     | 9.9                       | 0.25                                                   | 0.71                                     | 0.71 |
| 10          | Primary         | 1.9                       | 0.16                                                   | 0.32                                     | 0.20                                                   | 0.39                                     | 2.4                       | 0.21                                                   | 0.30                                     | 0.30 |
| 11          | Primary         | 31.9                      | 0.52                                                   | 0.71                                     | 0.68                                                   | 0.88                                     | n.a.                      | n.a.                                                   | n.a.                                     | n.a. |
|             | Ln <sub>m</sub> | 1.4                       | 0.29                                                   | 0.43                                     | 0.34                                                   | 0.52                                     | n.a.                      | n.a.                                                   | n.a.                                     | n.a. |

\* Tumor could not be defined due to post-obstruction atelectasis, which could not be distinguished from the primary tumor

BSIF, blood sampler input curve; IDIF, image derived input function; VOI, volume of interest; V<sub>T</sub>, volume of distribution; Ln<sub>m</sub> lymph node metastasis; n.a., not available

**Supplemental Table 2. Absolute values for test and retest scans with regions of interest delineated on parametric perfusion images**

| Patient no. | Lesion          | TEST                      |                                                                        |                                                          | RETEST                    |                                                                        |                                                          |
|-------------|-----------------|---------------------------|------------------------------------------------------------------------|----------------------------------------------------------|---------------------------|------------------------------------------------------------------------|----------------------------------------------------------|
|             |                 | VOI<br>(cm <sup>3</sup> ) | Perfusion<br>NLR / image*<br>(ml•cm <sup>-3</sup> •min <sup>-1</sup> ) | V <sub>T</sub><br>NLR / image*<br>(ml•cm <sup>-3</sup> ) | VOI<br>(cm <sup>3</sup> ) | Perfusion<br>NLR / image*<br>(ml•cm <sup>-3</sup> •min <sup>-1</sup> ) | V <sub>T</sub><br>NLR / image*<br>(ml•cm <sup>-3</sup> ) |
| 1           | Primary**       | n.a.                      | n.a.                                                                   | n.a.                                                     | n.a.                      | n.a.                                                                   | n.a.                                                     |
| 2           | Primary         | 4.4                       | 0.12 / 0.11                                                            | 0.37 / 0.40                                              | 2.0                       | 0.14 / 0.15                                                            | 0.41 / 0.43                                              |
| 3           | Primary         | 40.8                      | 0.38 / 0.39                                                            | 0.63 / 0.59                                              | 58.3                      | 0.43 / 0.44                                                            | 0.53 / 0.51                                              |
| 4           | Primary         | 13.6                      | 0.20 / 0.18                                                            | 0.64 / 0.59                                              | 10.3                      | 0.25 / 0.22                                                            | 0.45 / 0.40                                              |
| 5           | Primary         | 15.0                      | 0.69 / 0.67                                                            | 0.78 / 0.75                                              | 19.3                      | 0.72 / 0.73                                                            | 0.75 / 0.73                                              |
| 6           | Primary         | 15.5                      | 0.61 / 0.56                                                            | 0.70 / 0.68                                              | 52.6                      | 0.52 / 0.47                                                            | 0.64 / 0.62                                              |
| 7           | Primary         | 71.5                      | 0.31 / 0.30                                                            | 0.84 / 0.85                                              | 67.3                      | 0.32 / 0.32                                                            | 0.92 / 0.91                                              |
|             | Ln <sub>m</sub> | 1.5                       | 0.28 / 0.24                                                            | 0.49 / 0.53                                              | 1.9                       | 0.31 / 0.30                                                            | 0.61 / 0.61                                              |
|             | Ln <sub>m</sub> | n.a.                      | n.a.                                                                   | n.a.                                                     | n.a.                      | n.a.                                                                   | n.a.                                                     |
| 8           | Primary         | 9.3                       | 0.20 / 0.19                                                            | 0.43 / 0.46                                              | 8.5                       | 0.19 / 0.19                                                            | 0.30 / 0.36                                              |
| 9           | Primary         | 15.4                      | 0.37 / 0.40                                                            | 0.49 / 0.50                                              | 22.3                      | 0.33 / 0.39                                                            | 0.54 / 0.56                                              |
| 10          | Primary         | 2.0                       | 0.24 / 0.15                                                            | 0.40 / 0.26                                              | 1.9                       | 0.26 / 0.10                                                            | 0.40 / 0.19                                              |
| 11          | Primary         | 7.7                       | 0.46 / 0.40                                                            | 0.40 / 0.41                                              | n.a.                      | n.a.                                                                   | n.a.                                                     |
|             | Ln <sub>m</sub> | n.a.                      | n.a.                                                                   | n.a.                                                     | n.a.                      | n.a.                                                                   | n.a.                                                     |

\* NLR values determined by NLR of tumor tissue-activity curves; image values directly taken from parametric images

\*\* Tumor could not be defined due to post-obstruction atelectasis, which could not be distinguished from the primary tumor

VOI, volume of interest; NLR, non-linear regression; V<sub>T</sub>, volume of distribution; Ln<sub>m</sub>, lymph node metastasis; n.a., not available
